# Supplementary material for: Effect of Zinc Supplementation on Growth Outcomes in Children under 5 Years of Age
Source: PubMed Central journal article supplement (PMC5872795; doi:10.3390/nu10030377), 2018-03-20
Supplement: nutrients-10-00377-s001.pdf [file nutrients-10-00377-s001.pdf]

**Supplementary Table 1.** Search terms for the meta-analysis in Pubmed, web of science, Embase, and Cochrane library.

| Database         | Search terms                                                                                                                                                                                                                                                                                                                                                                                                                                                                                                                                                                                                                     |
|------------------|----------------------------------------------------------------------------------------------------------------------------------------------------------------------------------------------------------------------------------------------------------------------------------------------------------------------------------------------------------------------------------------------------------------------------------------------------------------------------------------------------------------------------------------------------------------------------------------------------------------------------------|
| Pubmed           | ("Zinc"[Mesh] OR "zinc"[tiab] OR "zinc supplement*"[tiab] OR "zinc fortified"[tiab] OR "zinc fortification*"[tiab]) AND ("stunting"[tiab] OR "body height"[mesh] OR "height"[tiab] OR "growth"[mesh] OR "Child Development"[Mesh] OR "Pregnancy Outcome"[Mesh] OR "Birth Weight"[tiab] OR "Premature Birth"[Mesh] OR "Infant, Small for Gestational Age"[Mesh] OR "Small for Gestational Age"[tiab]) AND ("children"[tiab] OR "child"[tiab] OR "infants"[tiab] OR "infant"[tiab] OR "pregnant"[tiab] OR "pregnancy"[tiab] OR "maternal"[tiab] OR "prenatal"[tiab]) AND (Clinical Trial[ptyp] OR trial[tiab] OR randomized[tiab]) |
| Web of science   | ts=zinc AND TS=("infant development" OR "stunting" OR "height" OR "child development" OR "growth" OR "birth outcome*" OR "Pregnancy outcome*" OR "birth weight") and TI=("trial*" OR "randomization" OR "randomized" OR "intervention*")                                                                                                                                                                                                                                                                                                                                                                                         |
| Embase           | 'zinc'/exp OR 'zinc' AND ('growth disorder'/exp OR 'growth disorder' OR 'growth'/exp OR 'growth' OR 'stunting'/exp OR 'stunting' OR 'height'/exp OR 'height' OR 'birth weight'/exp OR 'birth weight' OR 'birth outcome'/exp OR 'birth outcome' OR 'pregnancy outcome'/exp OR 'pregnancy outcome') AND ('child'/exp OR 'child' OR 'pregnant women'/exp OR 'pregnant women') AND [embase]/lim AND ('trial':ti OR 'trials':ti OR 'randomized':ti OR 'randomization':ti OR 'intervention':ti OR 'interventions':ti)                                                                                                                  |
| Cochrane library | 'TI Zinc'                                                                                                                                                                                                                                                                                                                                                                                                                                                                                                                                                                                                                        |

**Supplementary Table 2.** Characteristics of maternal trials.

| First author   | Year | Country    | Sample size | Intervention duration, weeks | Dose, mg/day | Mean maternal age, years | Mean gestational weeks | initial age, Background iron | Study score* | quality |
|----------------|------|------------|-------------|------------------------------|--------------|--------------------------|------------------------|------------------------------|--------------|---------|
| Hunt           | 1985 | USA        | 107         | 20                           | 20           | 15.9                     | 16.9                   | No                           | 4            |         |
| Mahomed        | 1989 | UK         | 491         | 17                           | 20           | 26.3                     | 20                     | No                           | 6            |         |
| Simmer         | 1991 | Australia  | 52          | 26                           | 22.5         | 26                       | .                      | No                           | 5            |         |
| Garg           | 1993 | India      | 162         | 24                           | 45           |                          | 24                     | No                           | -2           |         |
| Goldenberg     | 1995 | USA        | 580         | 20                           | 25           | 23.4                     | 19.2                   | No                           | 4            |         |
| Jonson         | 1996 | Denmark    | 1206        | 17                           | 44           | 28.3                     | 20                     | No                           | 6            |         |
| Caulfield      | 1999 | Peru       | 957         | 23                           | 15           | 24.6                     | 16.1                   | Yes                          | 4            |         |
| Osendarp       | 2000 | Bangladesh | 410         | 28                           | 30           | 23.1                     | 14                     | No                           | 6            |         |
| Castillo-Duran | 2001 | Chile      | 507         | 22                           | 20           | 16.3                     | 16.9                   | Yes                          | 5            |         |
| An             | 2001 | China      | 97          | 16                           | 10           | 24.7                     |                        | Yes                          | 2            |         |
| Christian      | 2003 | Nepal      | 1307        | 27                           | 30           | 24                       | 11.4                   | Yes                          | 6            |         |
| Qiu            | 2004 | China      | 670         | 28                           | 10.5         | 28                       | 12                     | No                           | 2            |         |
| Merialdi       | 2004 | Peru       | 222         | 26                           | 25           | 28.4                     | 13.4                   | Yes                          | 5            |         |
| Merialdi       | 2004 | Peru       | 195         | 26                           | 25           | 23                       | 13                     | Yes                          | 6            |         |
| Dijkhuizen     | 2004 | Indonesia  | 136         | 20                           | 30           | 25.1                     | 16.3                   | Yes                          | 5            |         |
| Hafeez         | 2005 | Pakistan   | 242         | 26                           | 20           | 25.7                     | 12.95                  | Yes                          | 5            |         |
| Aminisani      | 2009 | Iran       | 175         | 20.5                         | 50           | 23.9                     | 13                     | Yes                          | 5            |         |
| Saaka          | 2009 | Ghana      | 543         | 23                           | 20           | 26.9                     | 13                     | Yes                          | 6            |         |
| Danesh         | 2010 | Iran       | 84          | 27                           | 50           | 28.7                     | 14                     | No                           | 6            |         |
| Prawirohartono | 2013 | Indonesia  | 1956        | 20                           | 20           | 28                       | 22                     | No                           | 6            |         |
| Nossier        | 2015 | Egypt      | 392         | 24                           | 30           | 26.54                    | 15.6                   | Yes                          | 6            |         |
| Sorouri        | 2015 | Iran       | 528         | 24                           | 15           | 28                       | 16                     | Yes                          | 1            |         |
| Shahnazi       | 2017 | Iran       | 92          | 16                           | 40           | 30.4                     | 23                     | No                           | 6            |         |
| Darling        | 2017 | Tanzania   | 2056        | 29                           | 25           | 22.5                     | 9.8                    | Yes                          | 6            |         |

\* Study quality was assessed using the Cochrane Collaboration risk-of-bias tool for randomized controlled trials, including potential for selection bias, performance bias, detection bias, attrition bias, and reporting bias through a 6-question quality control check list. Each question was answered as low (score=1), high (score=-1), or unclear (score=0) risk of bias; and values were summed (potential range: -6 to +6).

**Supplementary Table 3.** Characteristics of infant and child trials.

| First author       | Year | Country          | Sample size | Intervention duration, weeks | Dose, mg/day | Mean child age, months | Background iron | study quality score* |
|--------------------|------|------------------|-------------|------------------------------|--------------|------------------------|-----------------|----------------------|
| Walravens          | 1983 | USA              | 40          | 52                           | 10.0         | 40                     | No              | 4                    |
| Matsuda            | 1984 | Japan            | 39          | 20                           | 2.2          | 1                      | No              | 1                    |
| Walravens          | 1989 | USA              | 50          | 26                           | 5.7          | 15.2                   | No              | 5                    |
| alravens           | 1992 | France           | 57          | 13                           | 5.0          | 5.4                    | No              | 5                    |
| Shrivastava        | 1992 | India            | 52          | 13                           | 5.6          | 16                     | No              | 2                    |
| Bates              | 1993 | Gambia           | 103         | 65                           | 20.0         | 17.7                   | No              | 6                    |
| Castillo-Duran     | 1994 | Chile            | 38          | 52                           | 10.0         | 8.7                    | No              | 4                    |
| Dirren             | 1994 | Ecuador          | 96          | 64.5                         | 8.6          | 33                     | No              | 5                    |
| Castillo-Duran     | 1995 | Chile            | 68          | 26                           | 3.0          | 0.1                    | No              | 5                    |
| Ninh               | 1996 | Vietnam          | 146         | 20                           | 10.0         | 17.6                   | No              | 5                    |
| Rosado             | 1997 | Mexico           | 194         | 52                           | 20.0         | 28.7                   | Yes             | 5                    |
| Rivera             | 1997 | Guatemala        | 89          | 29.9                         | 10.0         | 7.6                    | No              | 5                    |
| Gardner            | 1997 | Jamaica          | 61          | 12                           | 5.0          | 14.1                   | No              | 5                    |
| Kikafunda          | 1998 | Uganda           | 153         | 26                           | 8.6          | 55.8                   | No              | 5                    |
| Hershkovitz        | 1999 | Israel           | 25          | 12                           | 11.2         | 6.35                   | No              | 5                    |
|                    |      | Papua New Guinea |             |                              |              |                        |                 |                      |
| Shankar            | 2000 | Guinea           | 212         | 46                           | 8.6          | 20                     | No              | 6                    |
| Osendarp           | 2001 | Bangladesh       | 270         | 20                           | 5.0          | 0.9                    | No              | 5                    |
| Dijkhuizen         | 2001 | Indonesia        | 360         | 24                           | 7.1          | 4.2                    | Yes             | 6                    |
| Castillo-Duran     | 2001 | Chile            | 112         | 52                           | 5.0          | 0.6                    | No              | 4                    |
| Yang               | 2002 | China            | 116         | 52                           | 2.5          | 3.9                    | No              | 3                    |
| Muller             | 2003 | Burkina Faso     | 661         | 26                           | 10.7         | 18.2                   | No              | 6                    |
| Sur                | 2003 | India            | 100         | 52                           | 3.6          | 0.5                    | No              | 6                    |
| Penny              | 2004 | Peru             | 146         | 26                           | 10.0         | 18.9                   | No              | 6                    |
| Black              | 2004 | Bangladesh       | 186         | 26                           | 2.9          | 6.5                    | Yes             | 5                    |
| Alarcon            | 2004 | Peru             | 213         | 18                           | 7.0          | 17.5                   | Yes             | 5                    |
| Black              | 2004 | India            | 162         | 32                           | 4.3          | 1                      | Yes             | 4                    |
| Lind               | 2004 | Indonesia        | 666         | 26                           | 10.0         | 6.2                    | Yes             | 6                    |
| Gardner            | 2005 | Jamaica          | 114         | 26                           | 10.0         | 18.7                   | No              | 2                    |
| Brooks             | 2005 | Bangladesh       | 638         | 43                           | 10.0         | 5.3                    | No              | 5                    |
| Berger             | 2006 | Vietnam          | 770         | 26                           | 10.0         | 5.9                    | Yes             | 6                    |
| Heinig             | 2006 | USA              | 70          | 26                           | 5.0          | 4                      | No              | 6                    |
| Silva              | 2006 | Brasil           | 58          | 17                           | 10.0         | 23.5                   | Yes             | 4                    |
| Olney              | 2006 | Tanzania         | 212         | 26                           | 7.5          | 8.6                    | Yes             | 3                    |
| Wasantwisut        | 2006 | Thailand         | 607         | 26                           | 10.0         | 4.4                    | Yes             | 6                    |
| Brown              | 2007 | Peru             | 175         | 26                           | 3.0          | 7.5                    | Yes             | 4                    |
| Garenne            | 2007 | Burkina Faso     | 661         | 26                           | 10.7         | 18                     | No              | 2                    |
| Fahmida            | 2007 | Indonesia        | 353         | 26                           | 10.0         | 5.1                    | No              | 6                    |
|                    |      | Indonesia        |             |                              |              |                        |                 |                      |
|                    |      | Thailand         |             |                              |              |                        |                 |                      |
| Dijkhuizen         | 2008 | Vietnam          | 2451        | 26                           | 8.6          | 5.2                    | Yes             | 4                    |
| Wuehler            | 2008 | Ecuador          | 208         | 26                           | 7.0          | 20.9                   | No              | 4                    |
| Bueno              | 2008 | Spain            | 30          | 26                           | 3.0          | 0                      | No              | 4                    |
| Fischer Walker     | 2009 | Bangladesh       | 566         | 26                           | 2.9          | 6.3                    | Yes             | 5                    |
| Mozaffari-Khosravi | 2009 | Iran             | 85          | 26                           | 5.0          | 39.3                   | No              | 5                    |
| Taneja             | 2009 | India            | 2226        | 24                           | 18.0         | 15.3                   | No              | 5                    |
| Taneja             | 2009 | India            | 1911        | 50                           | 7.5          | 0.51                   | Yes             | 6                    |
| Mazariegos         | 2010 | Guatemala        | 384         | 26                           | 5.0          | 6                      | No              | 5                    |
| Aminisani          | 2011 | Iran             | 76          | 20                           | 5.0          | 1                      | No              | 6                    |
| Chen               | 2012 | China            | 181         | 26                           | 7.1          | 53                     | No              | 2                    |
| Radhakrishna       | 2013 | India            | 296         | 52                           | 5.0          | 4                      | No              | 5                    |
| Owusu-Agyei        | 2013 | Ghana            | 167         | 24                           | 10.0         | 14.3                   | No              | 1                    |

|           |      |           |      |      |      |      |     |    |
|-----------|------|-----------|------|------|------|------|-----|----|
| Soofi     | 2013 | Pakistan  | 1305 | 52   | 10.0 | 6    | Yes | 6  |
| Colombo   | 2014 | Peru      | 209  | 51.6 | 10.0 | 6    | Yes | 6  |
| Adriani   | 2014 | Indonesia | 24   | 26   | 0.4  | 54   | No  | 6  |
| Abdollahi | 2014 | Iran      | 593  | 13   | 5.0  | 14.5 | Yes | -2 |
| Locks     | 2016 | Tanzania  | 2400 | 78   | 8.3  | 1.37 | No  | 6  |

\*Study quality was assessed using the Cochrane Collaboration risk-of-bias tool for randomized controlled trials, including potential for selection bias, performance bias, detection bias, attrition bias, and reporting bias through a 6-question quality control check list. Each question was answered as low (score=1), high (score=-1), or unclear (score=0) risk of bias; and values were summed (potential range: -6 to +6).

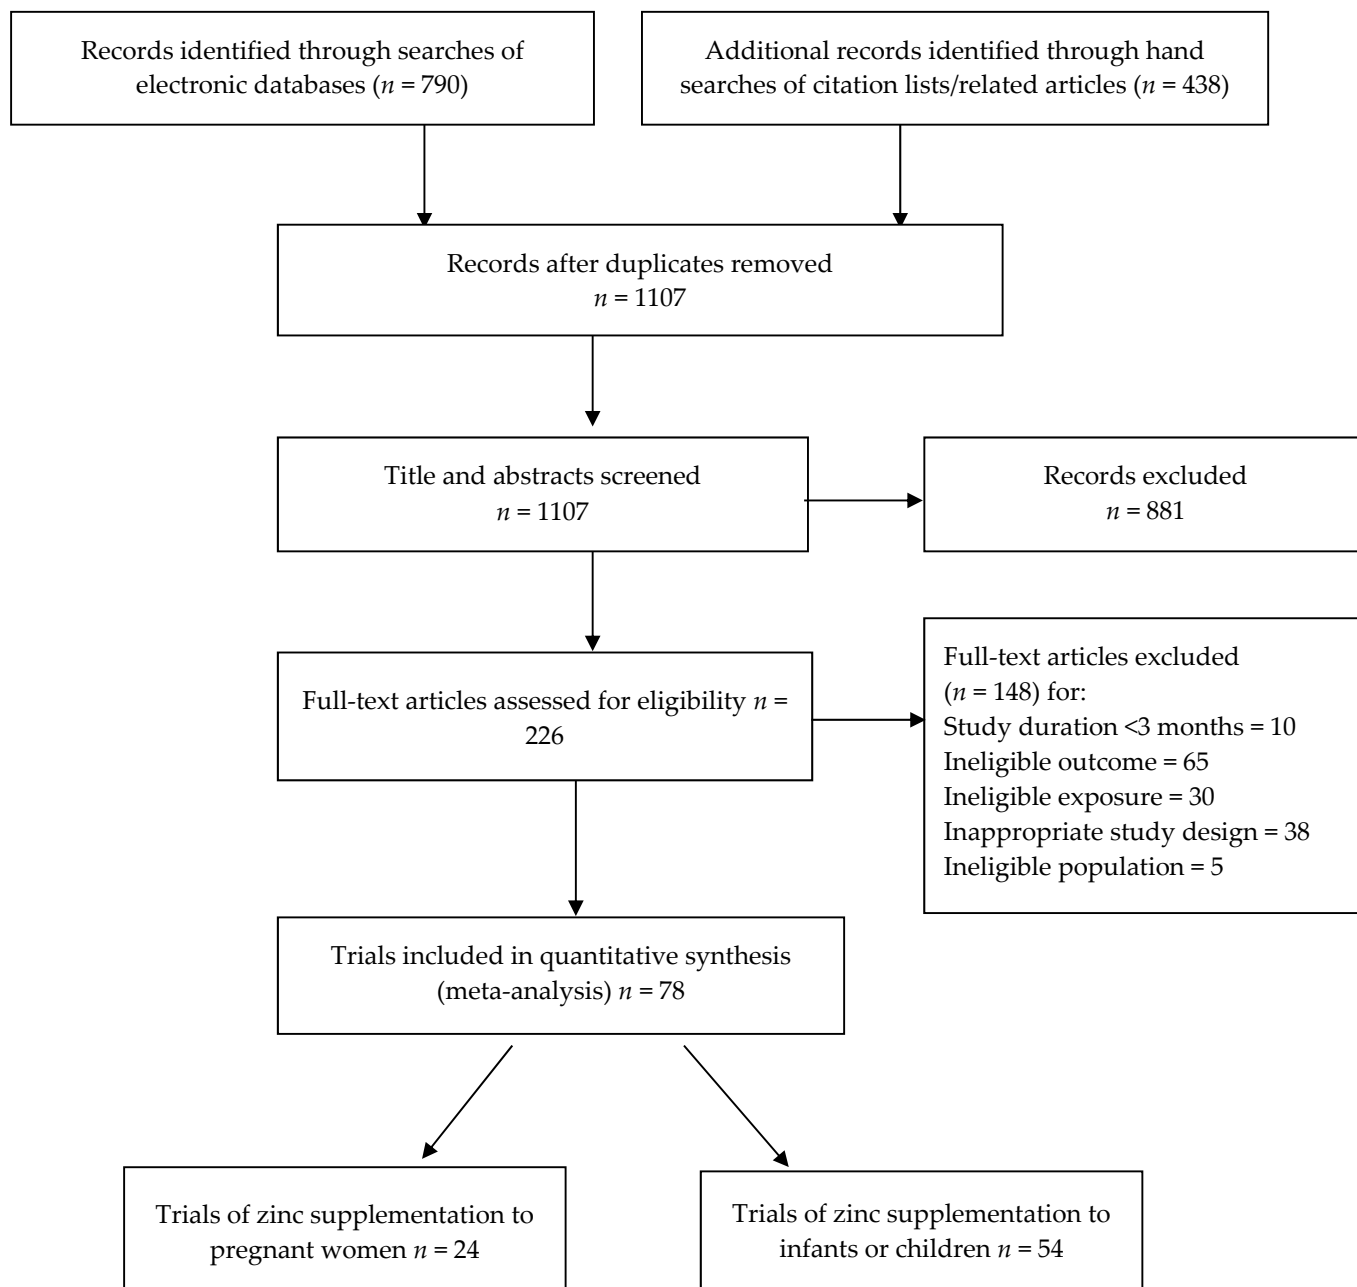

**Supplementary Figure 1.** PRISMA Flowchart of study selection and inclusion.

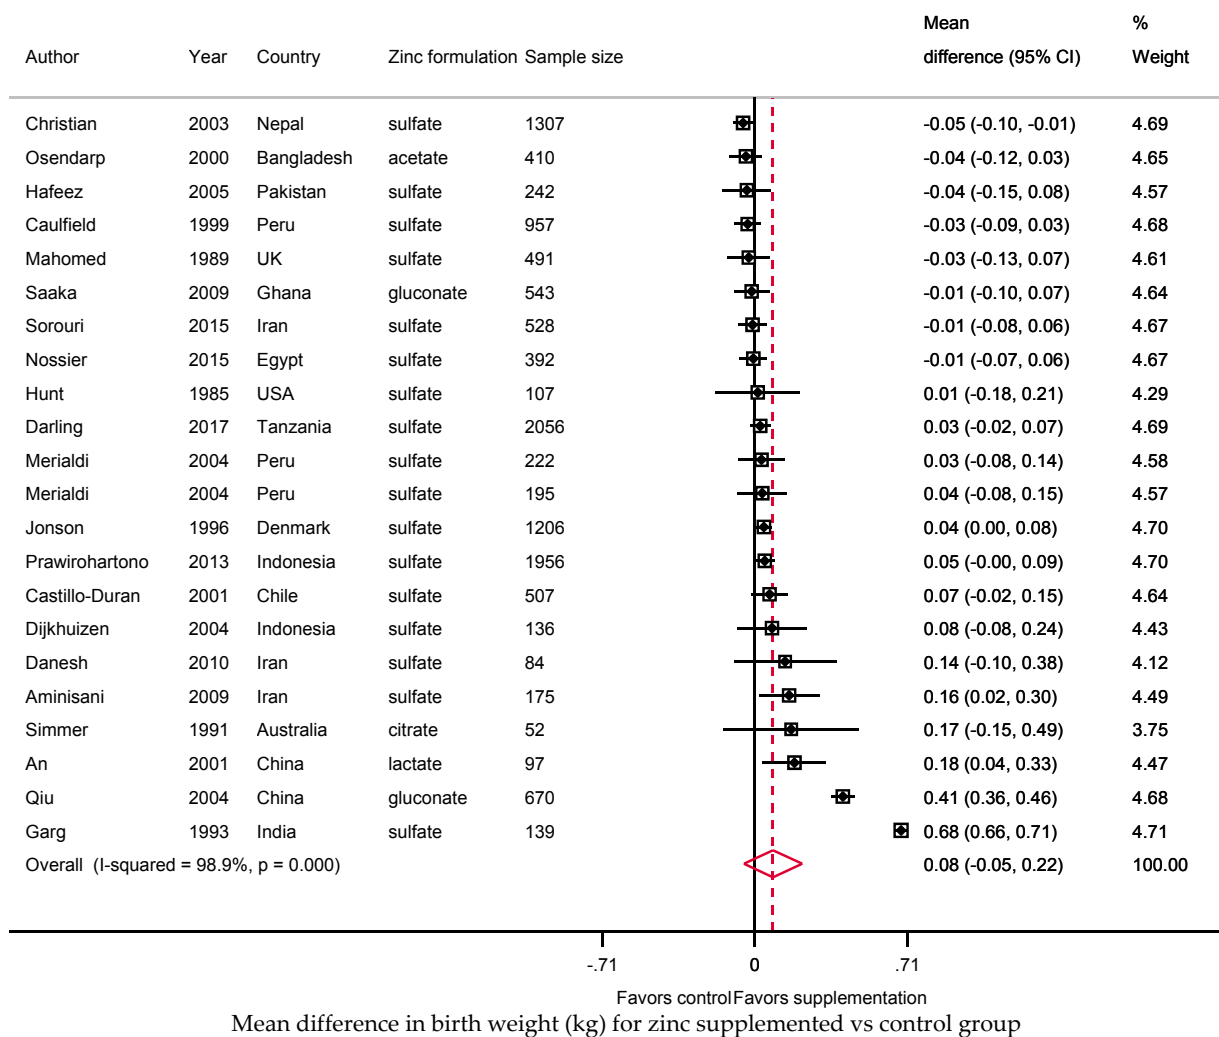

**Supplementary Figure 2.** Effect of zinc supplementation during pregnancy on birth weight in randomized controlled trials.



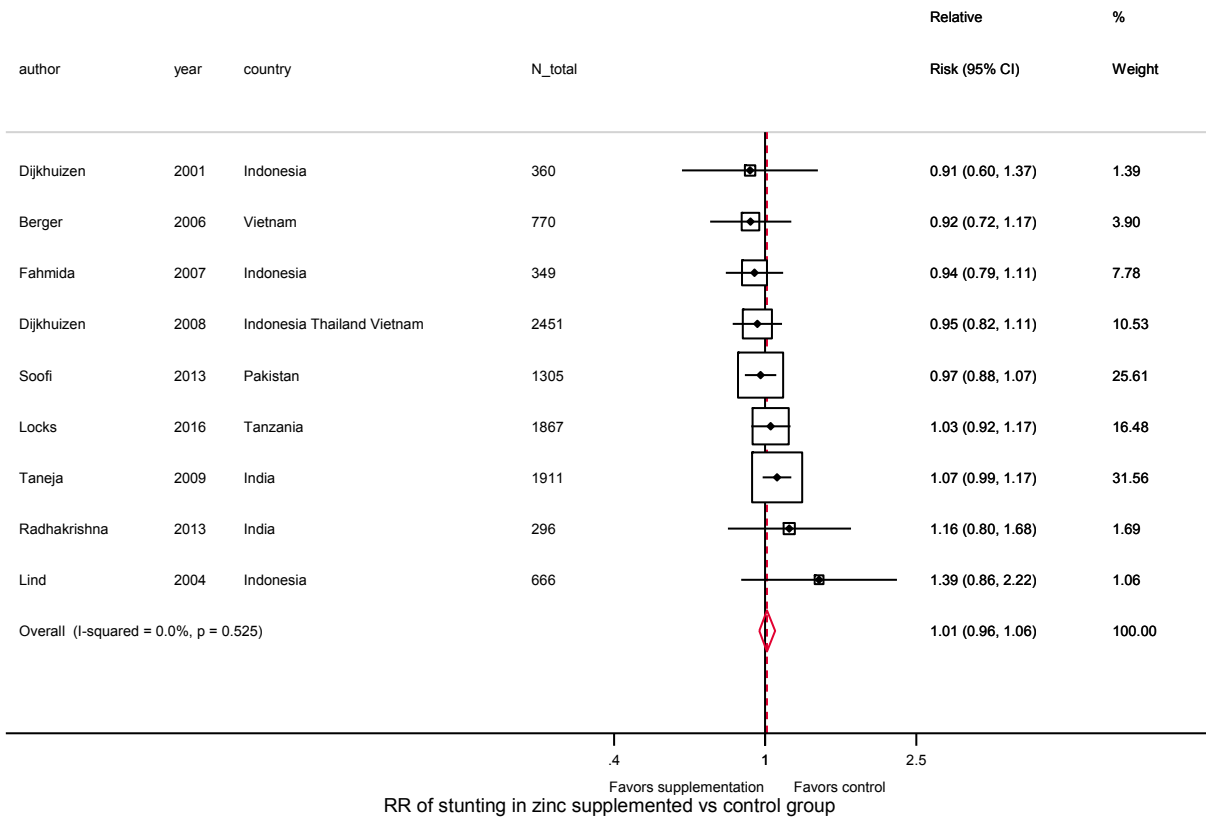

**Supplementary Figure 4.** Effect of zinc supplementation among children <5 y old on risk of stunting in randomized controlled trials.



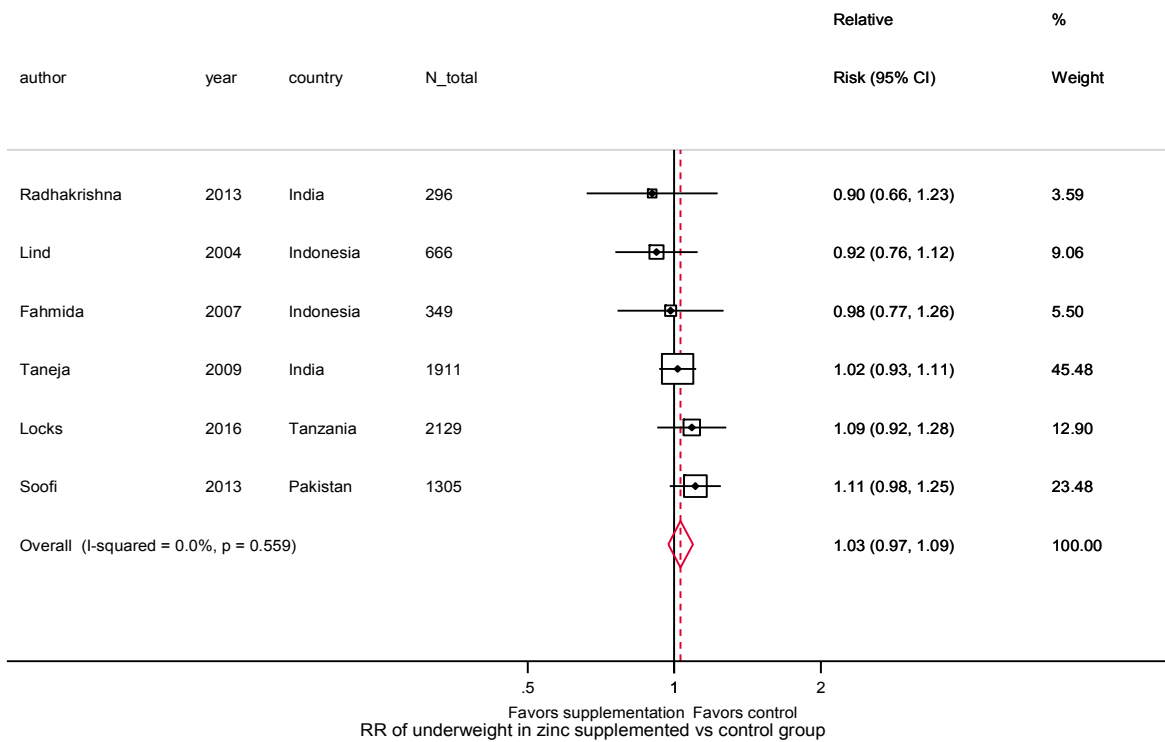

**Supplementary Figure 5.** Effect of zinc supplementation among children <5 y old on risk of underweight in randomized controlled trials.

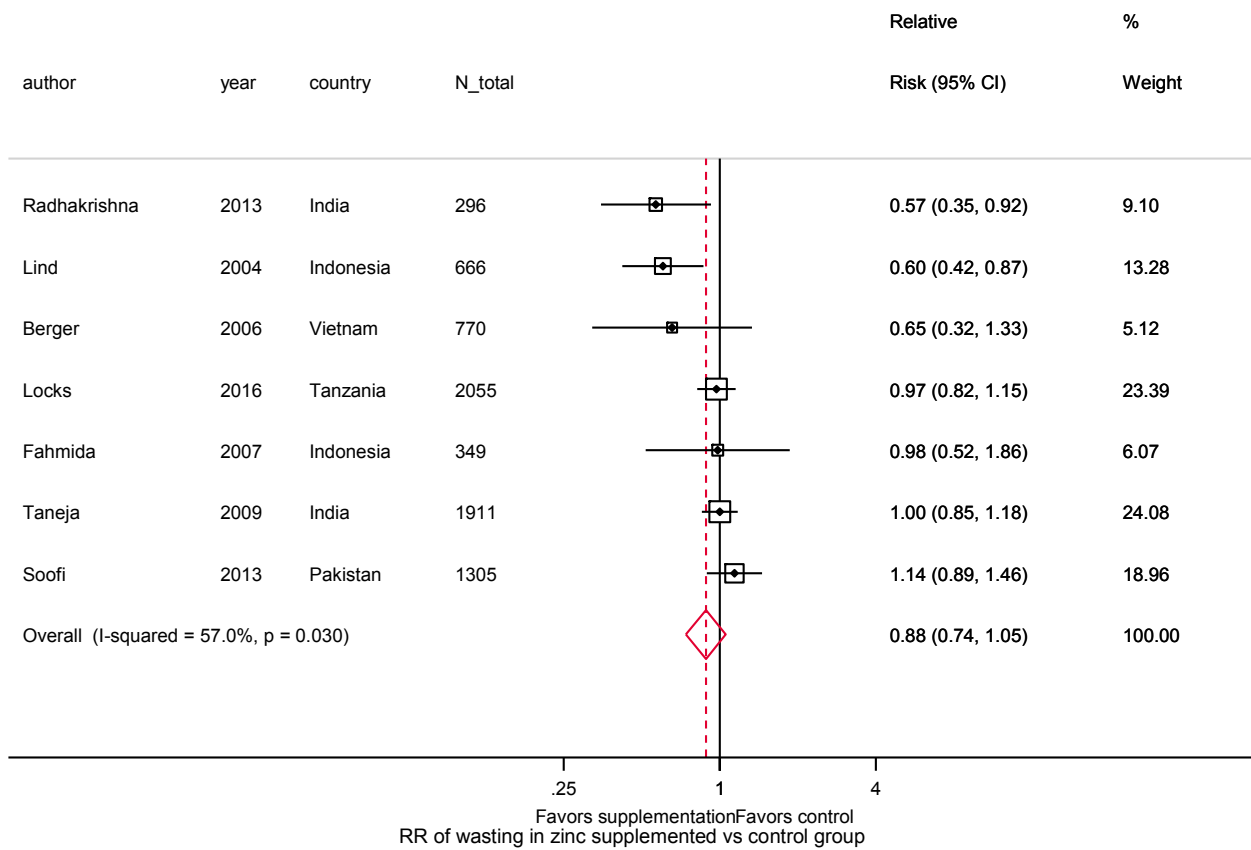

**Supplementary Figure 6.** Effect of zinc supplementation among children <5 y old on risk of wasting in randomized controlled trials.

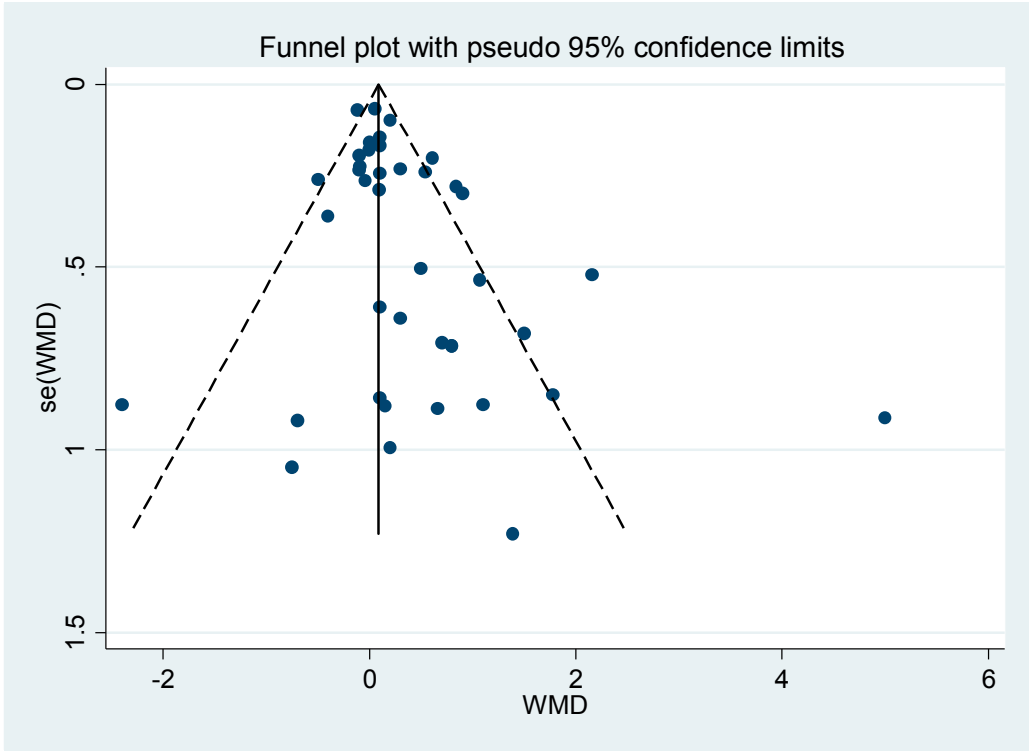

(A) Height, P=0.01

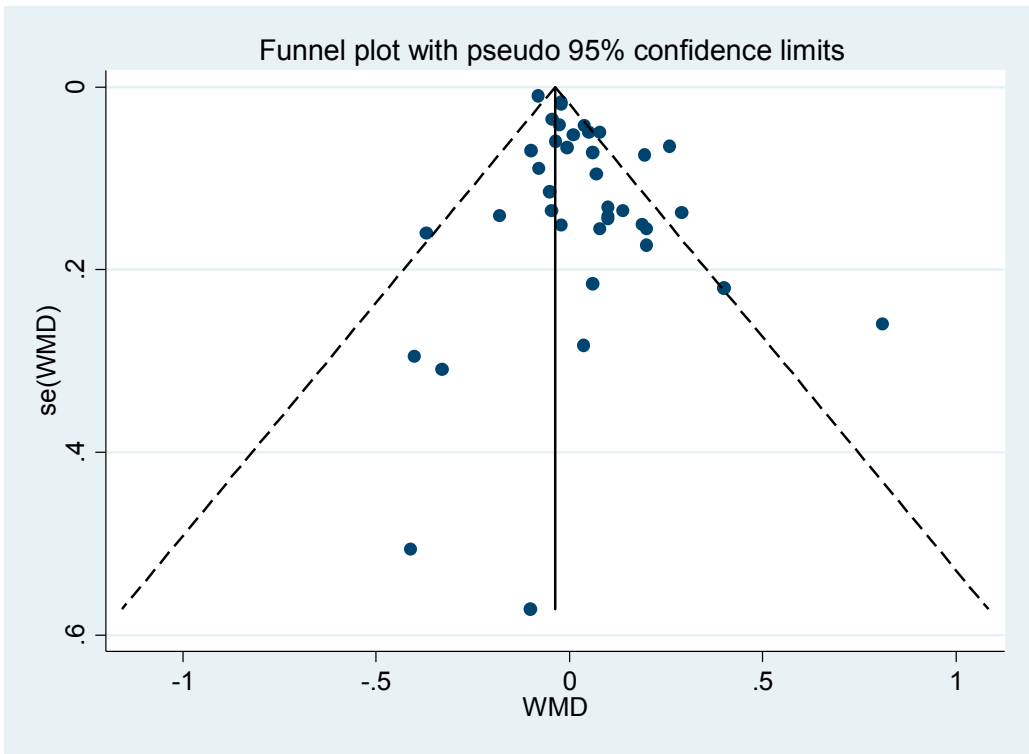

(B) HAZ, P<0.001

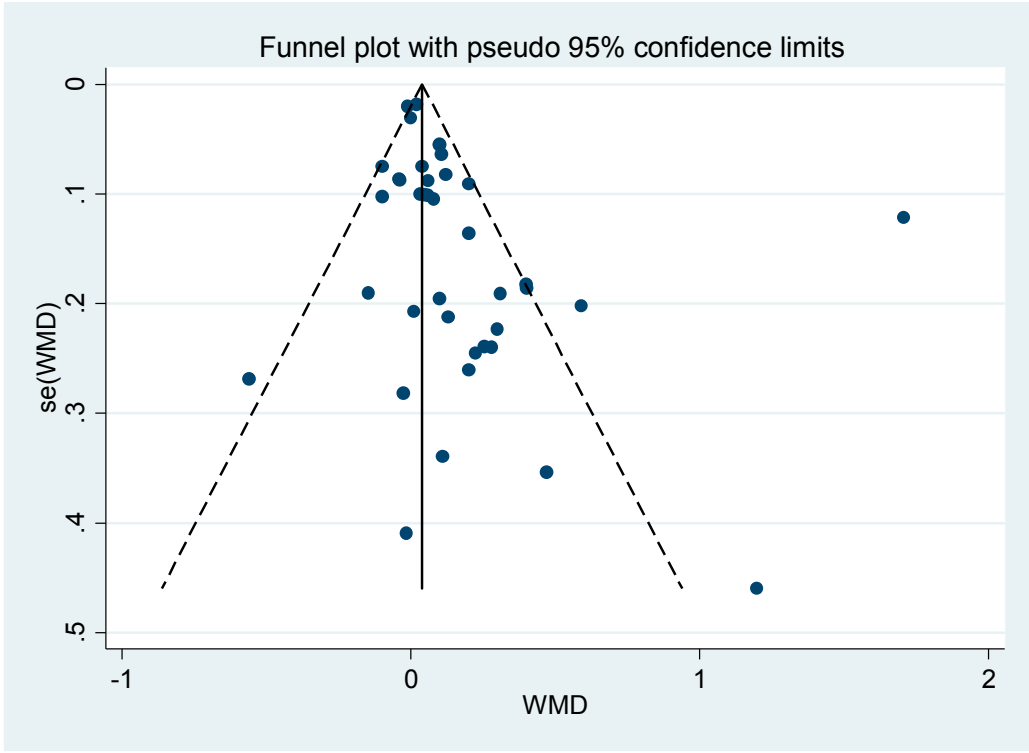

(C) Weight, P=0.03

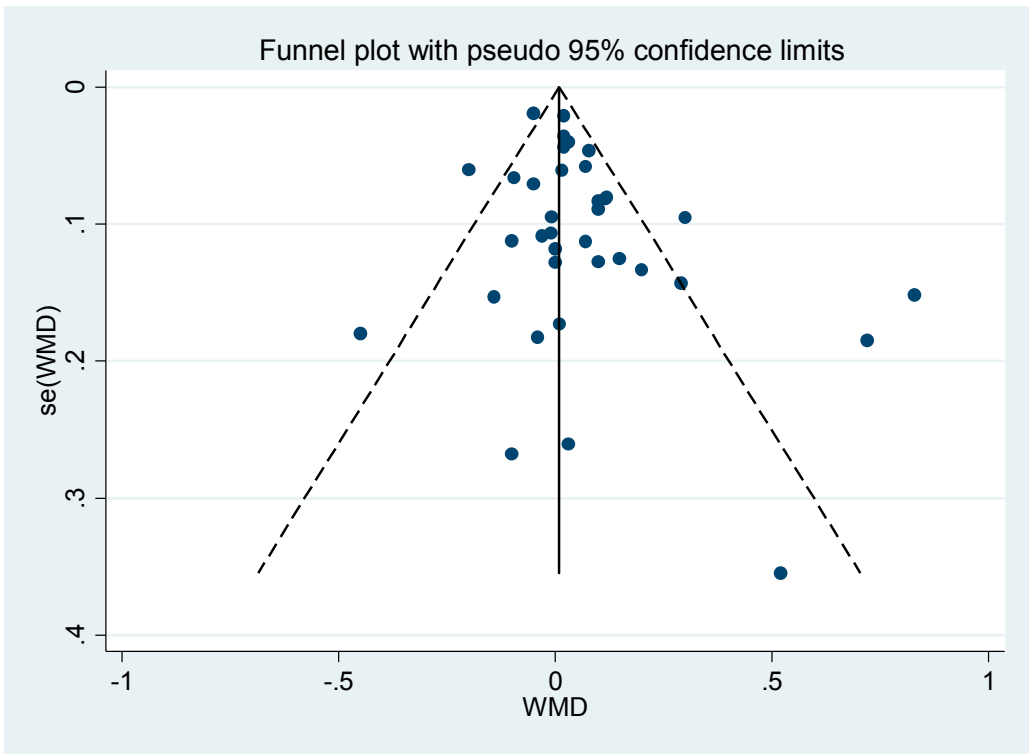

(D) WAZ, P=0.04

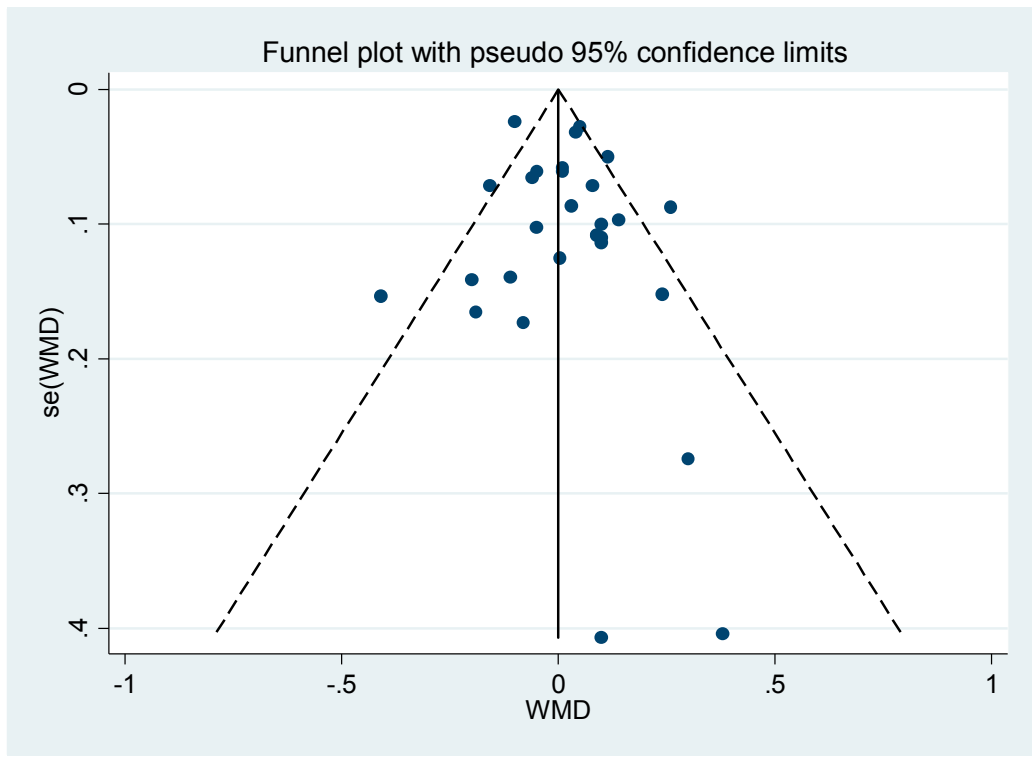

(E) WHZ, P=0.36

**Supplementary Figure 7.** Funnel plots for height (A), HAZ (B), weight (C), WAZ (D), and WHZ (E). P values are from Egger's test, which evaluates asymmetry of funnel plot of studies based on a linear regression of normalized effect estimate (estimated divided by its standard error) against precision (reciprocal of the standard error of the estimate).

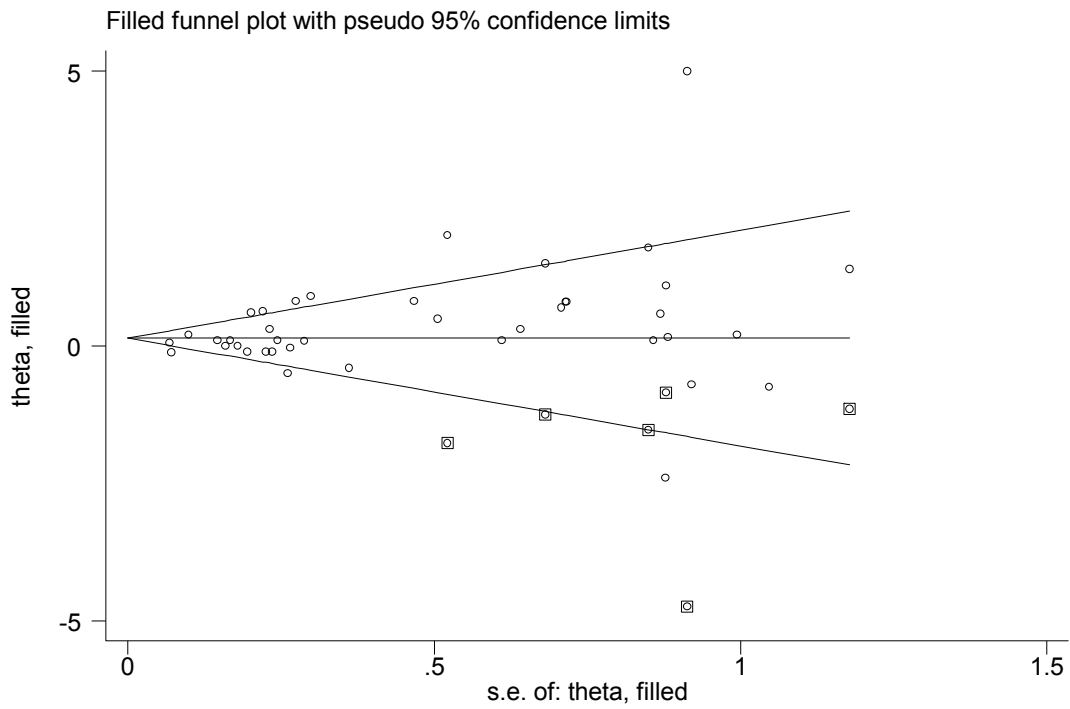

(a) Height

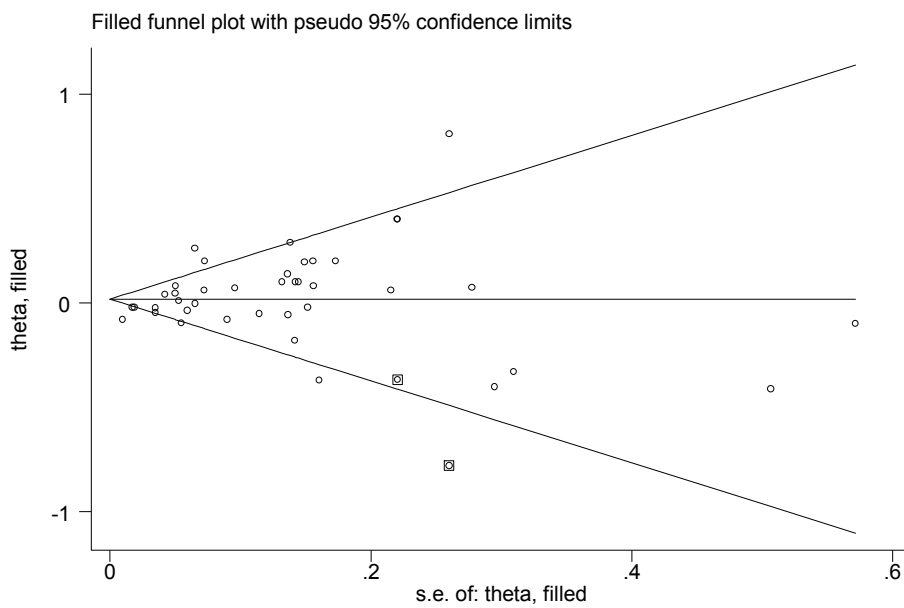

(b) HAZ

**Supplementary Figure 8.** Filled funnel plots for (a) height and (b) HAZ using Duval and Tweedie's non-parametric trim-and-fill method.

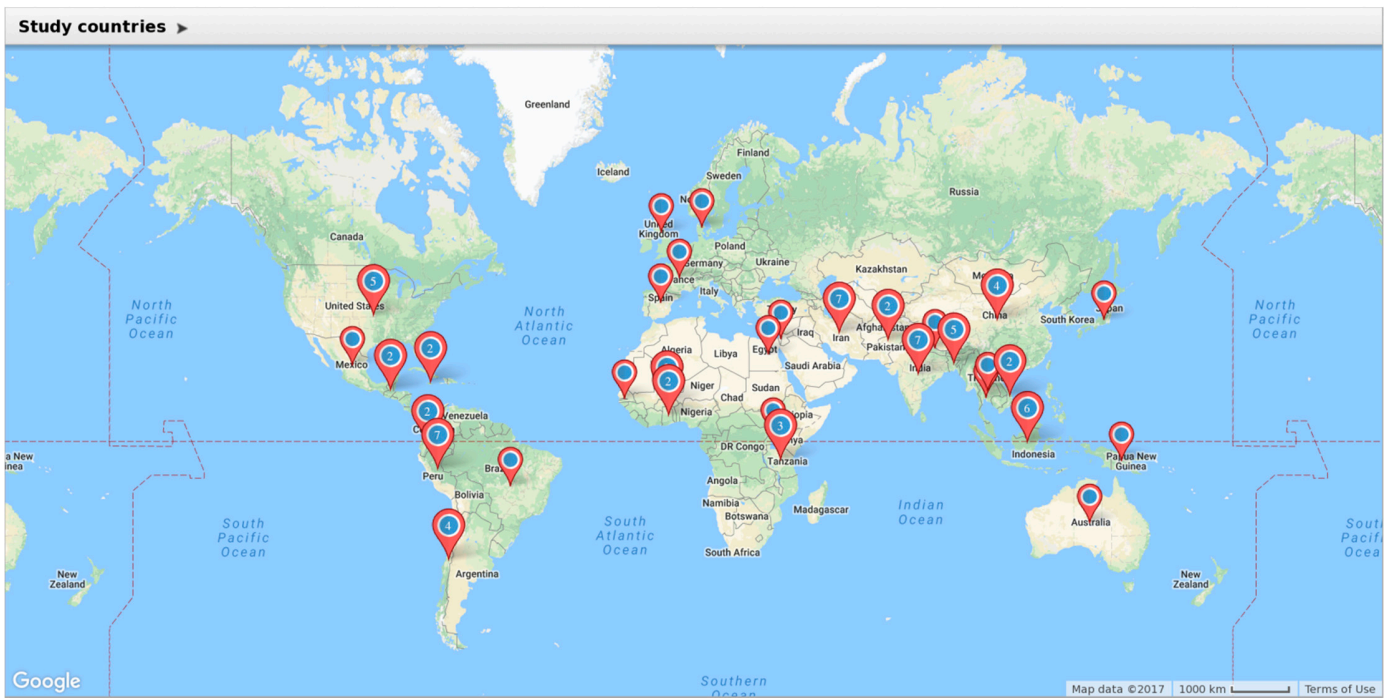

**Supplementary Figure 9.** A global map with all study locations ( $n = 78$ ) included in the meta-analysis.
